# Supplementary material for: 25-Hydroxyvitamin D in Cancer Patients Admitted to Palliative Care: A Post-Hoc Analysis of the Swedish Trial ‘Palliative-D’
Source: MDPI journal article supplement (doi:10.3390/nu14030602), 2022-01-29
Supplement: s1 [file s1]

**Table S1.** Cross sectional cohorts with measurements of 25-OHD in Sweden

| Author, Study                | Cohort, Location Time Period                                     | Study population, Sex, age                                                          | 25-OHD (nmol/L)                                                                                                             | Seasonal variation in 25-OHD (nmol/L)                                         | Proportions of vit D deficient participants (25-OHD, nmol/L)                                | Comments                                                                   |
|------------------------------|------------------------------------------------------------------|-------------------------------------------------------------------------------------|-----------------------------------------------------------------------------------------------------------------------------|-------------------------------------------------------------------------------|---------------------------------------------------------------------------------------------|----------------------------------------------------------------------------|
| Arnljots 2017 [1]            | Nursing homes, 57-58°N, Jan-March 2012                           | n=545, 32% men<br>Mean age 86                                                       | 27 (4–125)                                                                                                                  | No data                                                                       | 41% < 25<br>82% < 50                                                                        | 17% on vitamin D supplementation                                           |
| Samefors 2014 [2]<br>SHADES  | Nursing homes Southern Sweden, 2007-11                           | n=333, 32% men<br>Mean age women 86, men 83                                         | 40 (16)<br>Min-max 12–120                                                                                                   | May-Oct 39<br>Nov-April 35<br>(mean, p<0.01)                                  | 80% < 50                                                                                    | Vitamin D supplementation = exclusion criterion                            |
| Samefors 2017 [3]<br>CARDIPP | Community dwelling, DM II, 57-58°N, 2005-08                      | n=698, 66% men<br>Mean age 60                                                       | 51 (22)                                                                                                                     | Correction for season in multivariate analysis                                | 8% < 25<br>55% < 50                                                                         | Vitamin D supplementation = exclusion criterion                            |
| Carlsson 2016 [4]            | County hospital + general public 56,7°N<br>Feb 2014-April -15    | n=475<br>45% men<br>Mean age 78 in healthy controls                                 | HC ≥75 years: 74 (22-154)<br>Fractures: 50 (10-128)<br>Stroke: 62 (16-135)<br>FA: 56 (16-165)<br>Nursing homes: 38 (15-132) | Small difference April-Sept vs Oct-March (p=0.003).                           | Healthy controls: 13% < 50<br>Nursing home residents: 75% < 50                              | Vitamin D prescription: 15.5% FA, 0% HC.<br>No information on supplements. |
| Klingberg 2015 [5]           | Blood + trc donors 57.4°N<br>April-Nov 2008                      | n=540 blood donors, 62% men, mean age 40.5<br>n=75 trc donors, 92% men, mean age 46 | Mean 60 (10-224)                                                                                                            | July: 82 (26) vs Feb: 48 (21), p<0.001<br>Q1: 48 (20) vs Q3: 78 (27), p<0.001 | Q1: 59% <50, 88% <75<br>Q2: 36% <50, 76% <75<br>Q3: 8% <50, 45% <75<br>Q4: 30% <50, 80% <75 | 8 % on multivitamin supplementation                                        |
| Nälsén 2020 [6]<br>Riksmaten | All Swedish regions 2010-11                                      | n=268                                                                               | May-Oct 65 (24-168)<br>Nov-Apr 55 (20-94)                                                                                   | May-Oct: 5%<30, 18%<50<br>Nov-Apr: x%<30, 40%<50                              | See “seasonal variation”                                                                    | 7.5% on dietary supplements                                                |
| Buchebner 2019 [7]<br>OPRA   | Community dwelling, Southern Sweden, 1995-99, 16 years follow up | 75 years: n=1044<br>80 years n=715<br>85 years n=382<br>100% women                  | 75 years: 62 (19)<br>80 years: 78 (30)<br>85 years: 79 (26)                                                                 | No data                                                                       | Data not shown                                                                              | 75 years: 6 % vit D suppl.<br>80 years: 47 %<br>85 years: 52%              |
| Lundström 2019 [8]           | Overweight, impaired glucose tolerance 59°N, 2006-08             | n=158<br>45% men                                                                    | Before summer: 55 (22)<br>After summer: 66 (21)                                                                             | Seasonal variative also in non-users (p 0.03)                                 | Before summer: 37% < 30 ,<br>After summer: 4% < 30, 18% < 50                                | 13 % on supplements, mean dose 7.5 ug                                      |
| Björk 2019[9]                | Community dwelling (MrOS Sweden), 2000-02                        | n=2924<br>100% Men<br>Mean age 75                                                   | 79 (22.5)                                                                                                                   | Vitamin D values were deseasonalized                                          | 1% < 25                                                                                     | No information on vitamin D “ supplementation                              |

For cross-sectional 25-OHD, median values with (min-max) or mean values with standard deviation (SD) are presented. **Abbreviations:** 25-OHD: 25-hydroxyvitamin D, DM: Diabetes mellitus, FA: Frequent admissions, HC: healthy controls °N: degrees North (latitude), Q: Quarter (of the year), trc: thrombocytes, vit:vitamin

## References

1. Arnljots, R.; Thorn, J.; Elm, M.; Moore, M.; Sundvall, P.D. Vitamin D deficiency was common among nursing home residents and associated with dementia: a cross sectional study of 545 Swedish nursing home residents. *BMC Geriatr* **2017**, *17*, 229.
2. Samefors, M.; Östgren, C.J.; Mölsted, S.; Lannering, C.; Midlöv, P.; Tengblad, A. Vitamin D deficiency in elderly people in Swedish nursing homes is associated with increased mortality. *Eur J Endocrinol* **2014**, *170*, 667-675.
3. Samefors, M.; Scragg, R.; Länne, T.; Nyström, F.H.; Östgren, C.J. Association between serum 25(OH)D(3) and cardiovascular morbidity and mortality in people with Type 2 diabetes: a community-based cohort study. *Diabet Med* **2017**, *34*, 372-379.
4. Carlsson, M.; Wanby, P.; Brudin, L.; Lexne, E.; Mathold, K.; Nobin, R.; Ericson, L.; Nordqvist, O.; Petersson, G. Older Swedish Adults with High Self-Perceived Health Show Optimal 25-Hydroxyvitamin D Levels Whereas Vitamin D Status Is Low in Patients with High Disease Burden. *Nutrients* **2016**, *8*.
5. Klingberg, E.; Oleröd, G.; Konar, J.; Petzold, M.; Hammarsten, O. Seasonal variations in serum 25-hydroxy vitamin D levels in a Swedish cohort. *Endocrine* **2015**, *49*, 800-808.
6. Nälsén, C.; Becker, W.; Pearson, M.; Ridefelt, P.; Lindroos, A.K.; Kotova, N.; Mattisson, I. Vitamin D status in children and adults in Sweden: dietary intake and 25-hydroxyvitamin D concentrations in children aged 10-12 years and adults aged 18-80 years. *J Nutr Sci* **2020**, *9*, e47.
7. Buchebner, D.; Bartosch, P.; Malmgren, L.; McGuigan, F.E.; Gerdhem, P.; Akesson, K.E. Association Between Vitamin D, Frailty, and Progression of Frailty in Community-Dwelling Older Women. *J Clin Endocrinol Metab* **2019**, *104*, 6139-6147.
8. Lundström, P.; Caidahl, K.; Eriksson, M.J.; Fritz, T.; Krook, A.; Zierath, J.R.; Rickenlund, A. Changes in Vitamin D Status in Overweight Middle-Aged Adults with or without Impaired Glucose Metabolism in Two Consecutive Nordic Summers. *J Nutr Metab* **2019**, *2019*, 1840374.
9. Björk, A.; Ribom, E.; Johansson, G.; Scragg, R.; Mellström, D.; Grundberg, E.; Ohlsson, C.; Karlsson, M.; Ljunggren, Ö.; Kindmark, A. Variations in the vitamin D receptor gene are not associated with measures of muscle strength, physical performance, or falls in elderly men. Data from MrOS Sweden. *J Steroid Biochem Mol Biol* **2019**, *187*, 160-165.

**Table S2.** Baseline levels and change in 25-OHD (nmol/L) after 12 weeks supplementation of vitamin D3 4000 IU/day in relation to cutoff levels in a cohort of patients with cancer in palliative phase.

| Baseline<br>25-OHD | Number of<br>patients (%) | 25-OHD at<br>12 weeks |        |         |         |         |
|--------------------|---------------------------|-----------------------|--------|---------|---------|---------|
|                    |                           | ≤ 25                  | 26-50  | 51-75   | 76-100  | >100    |
| ≤ 25               | 9 (13)                    | 0                     | 2 (22) | 3 (33)  | 2 (22)  | 2 (22)  |
| 26-50              | 58 (87)                   | 0                     | 7 (12) | 15 (26) | 23 (40) | 13 (22) |

**Table S3.** 25-OHD in the screening cohort (n=530) i relation to season.

| <b>Time period</b> | <b>Number of cases, N (%)</b>                     | <b>25-OHD Median (IQR) Min-max</b> | <b>25-OHD Mean (SD)</b> | <b>25-OHD &lt;25 n (%)</b> | <b>25-OHD 25-49 n (%)</b> | <b>25-OHD 50-74 n (%)</b> | <b>25-OHD 75-124 n (%)</b> | <b>25-OHD ≥125 n (%)</b> | <b>Comparison of mean 25-OHD-levels between Q1-Q4</b> |
|--------------------|---------------------------------------------------|------------------------------------|-------------------------|----------------------------|---------------------------|---------------------------|----------------------------|--------------------------|-------------------------------------------------------|
| <b>Q1</b>          | 186<br><i>Jan: 67<br/>Feb: 51<br/>March: 68</i>   | 52<br>(37-67)<br>8-195             | 55,4<br>(28.4)          | 18 (9)                     | 69 (37)                   | 72 (39)                   | 22 (12)                    | 5 (3)                    | Q1vs Q2: 0.85<br>Q1vs Q3: 0.86<br>Q1vs Q4: 0.86       |
| <b>Q2</b>          | 85<br><i>April: 33<br/>May: 40<br/>June: 12</i>   | 50<br>(35-72)<br>15-149            | 56.1<br>(28.4)          | 10 (12)                    | 32 (38)                   | 24 (28)                   | 16 (19)                    | 3 (3)                    | Q2 vs Q3: 0.74<br>Q2 vs Q4: 0.25                      |
| <b>Q3</b>          | 84<br><i>July: 16<br/>August: 24<br/>Sept: 44</i> | 53<br>(39-70)<br>8-129             | 54.7<br>(23.9)          | 8 (10)                     | 27 (32)                   | 33 (39)                   | 15 (18)                    | 1 (1)                    | Q3 vs Q4: 0.44                                        |
| <b>Q4</b>          | 175<br>Oct: 34<br>Nov: 92<br>Dec: 49              | 50<br>(39-63)<br>9-175             | 52.3<br>(22.9)          | 18 (10)                    | 67 (38)                   | 64 (37)                   | 25 (14)                    | 1 (1)                    |                                                       |
| <b>Nov-April</b>   | 360                                               | 50<br>(37-66)<br>8-195             | 54.2<br>(26.5)          | 35 (10)                    | 140 (39)                  | 130 (36)                  | 48 (13)                    | 7 (2)                    | Nov-April vs May-Oct: 0.82                            |
| <b>May-Oct</b>     | 170                                               | 53<br>38-70<br>8-149               | 54.8<br>(24.8)          | 19 (11)                    | 55 (32)                   | 63 (37)                   | 30 (18)                    | 3 (2)                    |                                                       |
| <b>All</b>         | 530                                               | ref                                | ref                     | 54 (10)                    | 210 (40)                  | 183 (34)                  | 73 (14)                    | 10 (2)                   |                                                       |

**Table S4.** Change in 25-OHD over 12 weeks in relation to season in vitamin D supplemented patients and in patients receiving placebo.

| <b>Change in 25-OHD in nmol/L over 12 weeks in patients randomized to placebo</b>     |                    |                                                        |                                                    |
|---------------------------------------------------------------------------------------|--------------------|--------------------------------------------------------|----------------------------------------------------|
| Time period                                                                           | Number of subjects | Change in 25-OHD<br><b>Median (IQR) <i>min-max</i></b> | p=                                                 |
| Q1                                                                                    | 21                 | <b>3</b> (-3 – 14)<br>-25 – 44                         | Q1 vs Q2: 0.90<br>Q1 vs Q3: 0.15<br>Q1 vs Q4: 0.03 |
| Q2                                                                                    | 14                 | <b>4</b> (-6 – 13.5),<br>-15 – 23                      | Q2 vs Q3: 0.37<br>Q2 vs Q4: 0.15                   |
| Q3                                                                                    | 12                 | <b>0</b> (-7.25– 5.5)<br>-10 – 13                      | Q3 vs Q4: 0.34                                     |
| Q4                                                                                    | 31                 | <b>-3</b> (-10 – 6.5)<br>-17– 20                       |                                                    |
| May-October                                                                           | 24                 | <b>0</b> (-6 – 12)<br>-25 – 44                         | Nov-April vs<br>May-Oct: 0.60                      |
| Nov-April                                                                             | 59                 | <b>1</b> (-8 – 6)<br>-13 – 23                          |                                                    |
| All                                                                                   | 83                 | <b>0</b> (-6 – 10.5)<br>-25 – 44                       |                                                    |
| <b>Change in 25-OHD over 12 weeks in patients randomized to vitamin D 4000 IU/day</b> |                    |                                                        |                                                    |
| Time period                                                                           | Number of subjects | Change in 25OHD<br><b>Median (IQR) <i>min-max</i></b>  | p=                                                 |
| Q1                                                                                    | 19                 | <b>44</b> (36 – 62)<br>26 – 116                        | Q1vsQ2: 0.87<br>Q1vsQ3: 0.27<br>Q1vsQ4: 0.07       |
| Q2                                                                                    | 11                 | <b>47</b> (35 – 65)<br>7– 84                           | Q2vsQ4: 0.30<br>Q2 vs Q3: 0.54                     |
| Q3                                                                                    | 12                 | <b>35.5</b> (8.5 – 61)<br>-2 – 122                     | Q3 vs Q4: 0.98                                     |
| Q4                                                                                    | 25                 | <b>37</b> (20 – 55)<br>-2 – 94                         |                                                    |
| May-October                                                                           | 24                 | <b>41</b> (20 – 61),<br>-2 – 122                       | Nov-April vs<br>May-Oct: 0.95                      |
| Nov-April                                                                             | 43                 | <b>39.5</b> (28.5 – 55)<br>-2 - 116                    |                                                    |
| All                                                                                   | 67                 | <b>39.5</b> (27 – 58.5)<br>-2 – 122                    | 0.95                                               |
